# Supplementary material
Source: HighWire-hosted journal article supplement (http://jpet.aspetjournals.org/highwire/filestream/146996/field_highwire_adjunct_files/0/263517SupplData.pdf)

**COMT-catalyzed palmitic acid methyl ester biosynthesis in perivascular adipose tissue  
and its potential role against hypertension**

Chin-Hung Liu, Hao-Jen Hsu, Tzu-Ling Tseng, Tsung-Jen Lin, Wei-Hsiang Weng,

Mei-Fang Chen\* and Tony Jer-Fu Lee\*

Journal of Pharmacology and Experimental Therapeutics

**Supplementary Figure 1. Ion chromatogram and mass spectra of [<sup>13</sup>C<sub>16</sub>]-PAME in GC-MS analysis.** (A) In the chromatogram, peak 1, which represents PAME, and peak 2, which represents [<sup>13</sup>C<sub>16</sub>]-PAME, have identical retention time ( $t_R = 8.33$  min). (B) The characteristic molecular ion ( $[M]^+$ ) of PAME in the mass spectrum is 270 of  $m/z$  and of [<sup>13</sup>C<sub>16</sub>]-PAME ( $= [M]^+ + 16$ ) is 286 of  $m/z$ . Pentadecanoic acid methyl ester was used as internal standard (IS). PAME, palmitic acid methyl ester; PA, palmitic acid; GC-MS, gas chromatography-mass spectrometry.

**Supplementary Figure 2. Oil Red O staining of lipid droplets in differentiated 3T3-L1 adipocytes.** (A) 3T3-L1 adipocytes were stained with Oil Red O, after the differentiation of 3T3-L1 cells were induced for 6 days and subsequently maintained for additional 4 days. The red color indicates lipid droplets in the adipocytes. (B) A enlarged image from plot A.

**Supplementary Figure 3. Concentration-dependent decrease in PAME biosynthesis in isolated aortic PVAT of SD rats in the presence of 300 nM or 1  $\mu$ M tolcapone pre-incubation.** PAME, palmitic acid methyl ester; SD, Sprague Dawley; PVAT, perivascular adipose tissue.

**Supplementary Figure 4. Whole uncropped images of original western blots from Figure 2D ( $n = 4$ ).**

**Supplementary Figure 5. Whole uncropped images of original western blots from Figure 5C ( $n = 4-5$ ).**

**Supplementary Figure 6. Hematoxylin and eosin Y-stained cross-sections of aortic (A, C) and mesenteric PVATs (B, D).** PVATs were harvested from a Sprague Dawley rat. The specimens were examined under a light microscope with magnification at 100X (A and B) and 400X (C and D). Scale bars indicate 200  $\mu$ m in (A and B), and 50  $\mu$ m in (C and D), respectively. PVAT, perivascular adipose tissue.

Supplementary Figure 1—Chin-Hung Liu *et al.*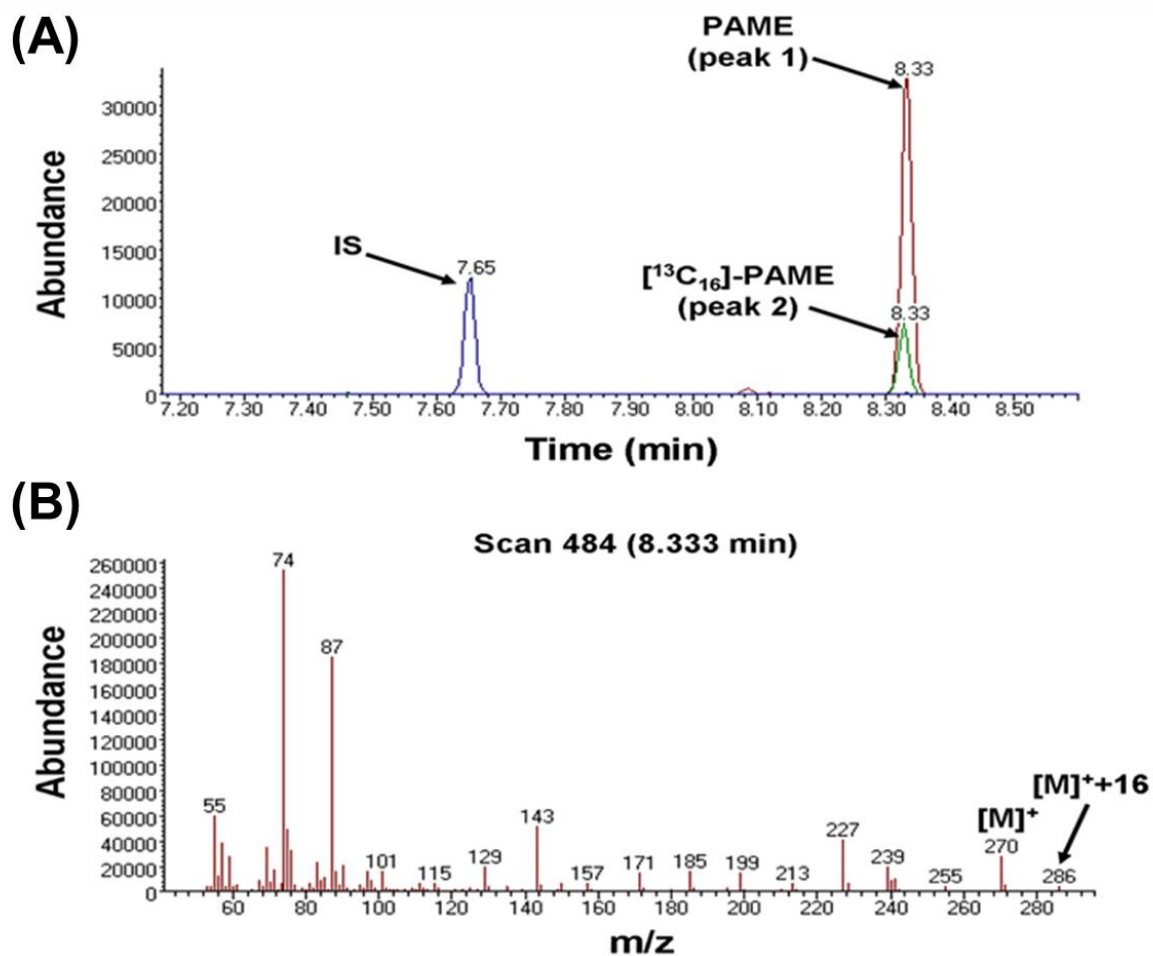Supplementary Figure 2—Chin-Hung Liu *et al.*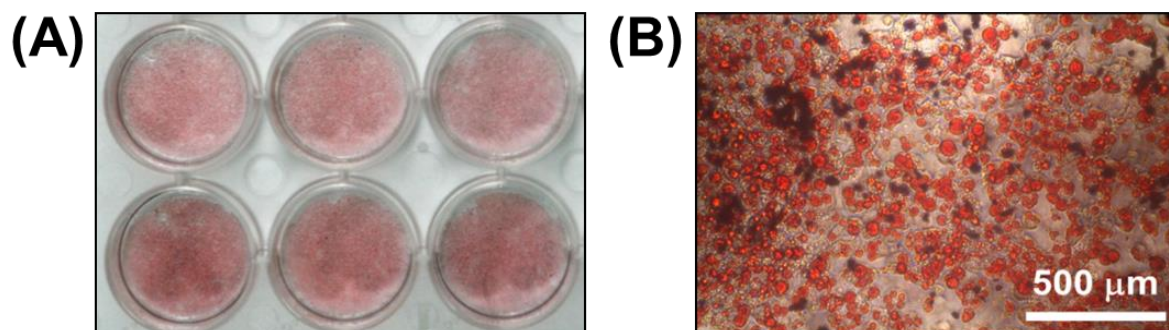

Supplementary Figure 3—Chin-Hung Liu *et al.*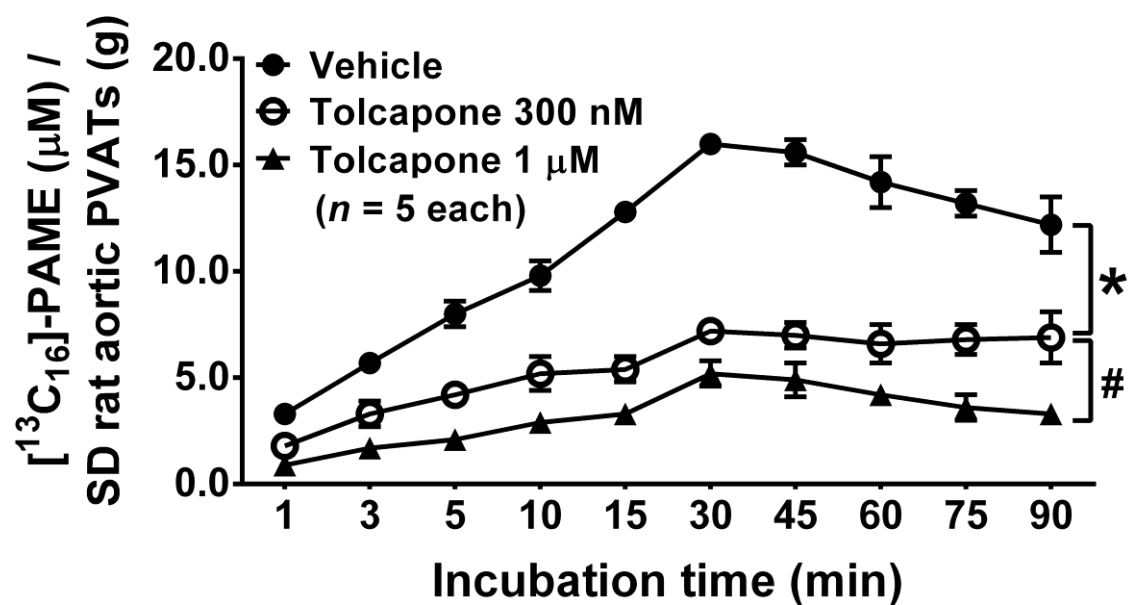Supplementary Figure 4—Chin-Hung Liu *et al.*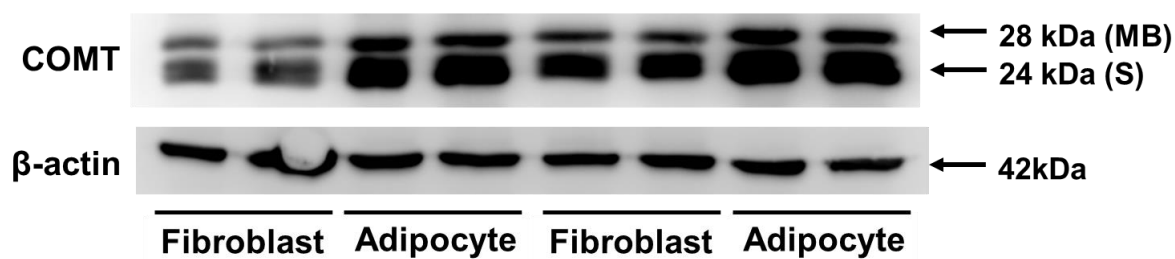

Supplementary Figure 5—Chin-Hung Liu *et al.*

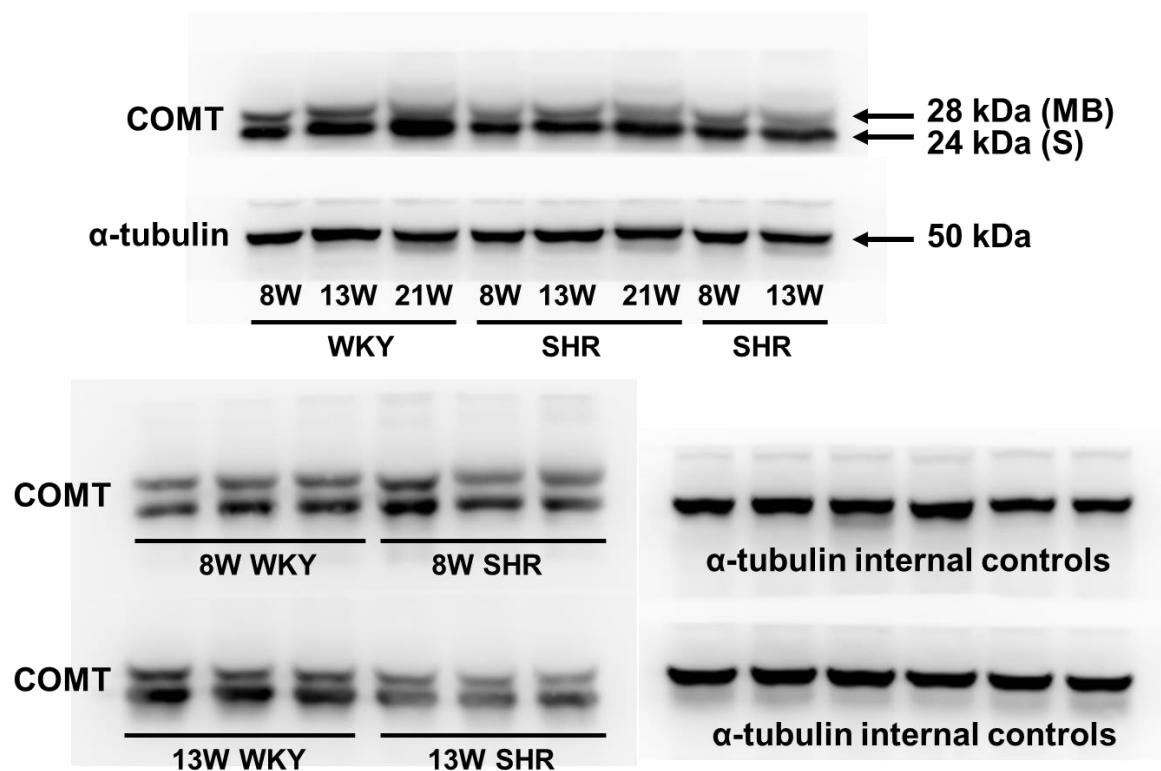

Supplementary Figure 6—Chin-Hung Liu *et al.*

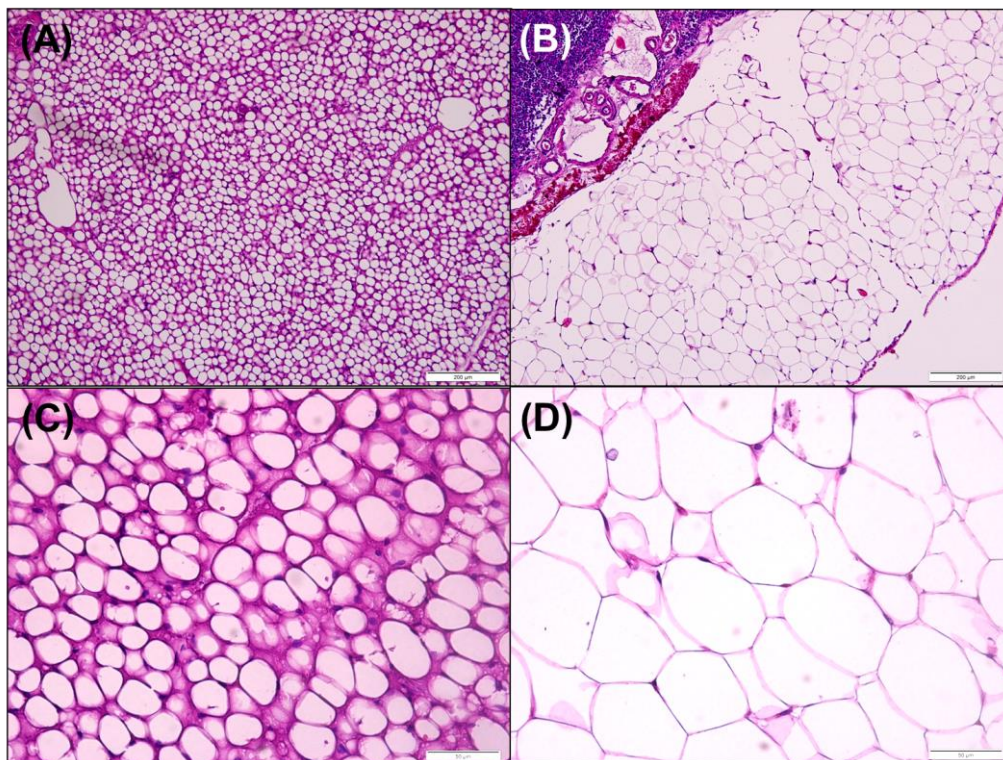

Supplement: 263517SupplData.pdf [file 263517SupplData.pdf]
